# Supplementary material for: Combined PI3Kα-mTOR Targeting of Glioma Stem Cells
Source: PubMed Central journal article supplement (PMC7736588; doi:10.1038/s41598-020-78788-z), 2020-12-14

## Combined PI3K $\alpha$ -mTOR Targeting of Glioma Stem Cells

Frank Eckerdt<sup>1,2</sup>, Jonathan B. Bell<sup>1</sup>, Christopher Gonzalez<sup>1</sup>, Michael S. Oh<sup>1</sup>, Ricardo E. Perez<sup>1,3</sup>, Candice Mazewski<sup>1,3</sup>, Mariafausta Fischietti<sup>1,3</sup>, Stewart Goldman<sup>1,4</sup>, Ichiro Nakano<sup>5</sup> and Leonidas C. Platanias<sup>1,3,6</sup>.

<sup>1</sup>Robert H. Lurie Comprehensive Cancer Center of Northwestern University, Chicago, IL, USA

<sup>2</sup>Department of Neurological Surgery, Feinberg School of Medicine, Northwestern University, Chicago, IL, USA

<sup>3</sup>Division of Hematology/Oncology, Department of Medicine, Feinberg School of Medicine, Northwestern University, Chicago, IL, USA

<sup>4</sup>Division of Hematology/Oncology/Stem Cell Transplantation, Department of Pediatrics, Ann & Robert H. Lurie Children's Hospital of Chicago, Chicago, IL, USA

<sup>5</sup>Department of Neurosurgery and O'Neil Comprehensive Cancer Center, University of Alabama at Birmingham, Birmingham, AL, USA

<sup>6</sup>Medicine Service, Jesse Brown VA Medical Center, Chicago, IL, USA

**Running Title:** Dual PI3K $\alpha$  and mTOR Inhibition in GBM

**Keywords:** Glioblastoma, glioma stem cells, PI3K, mTOR, alpelisib

**Correspondence to:** Frank D. Eckerdt, Robert H. Lurie Comprehensive Cancer Center, 303 East Superior Street, Lurie 3-220, Chicago, IL 60611, Tel. 312-503-0292; Email: [frank.eckerdt@northwestern.edu](mailto:frank.eckerdt@northwestern.edu)

Supplemental Table 1

| <b>ANTIBODY</b>                             | <b>SOURCE</b>             | <b>IDENTIFIER</b>                |
|---------------------------------------------|---------------------------|----------------------------------|
| Pan AKT (40D4)                              | Cell Signaling Technology | Cat# 2920<br>RRID:AB_1147620     |
| p-AKT(Ser <sup>473</sup> ) (D9E)            | Cell Signaling Technology | Cat# 4060<br>RRID:AB_2315049     |
| p-AKT(Thr <sup>308</sup> ) (C31E5E)         | Cell Signaling Technology | Cat#:2965<br>RRID:AB_2255933     |
| HSP-90 (H-114)                              | Santa Cruz Biotechnology  | Cat#:sc-7947<br>RRID:AB_2121235  |
| GAPDH                                       | Millipore                 | Cat# MAB374,<br>RRID:AB_2107445  |
| Nestin (10C2)                               | StemCell Technologies     | Cat#:60091<br>RRID:AB_2650581    |
| PI3 Kinase p110 $\alpha$ (C73F8)            | Cell Signaling Technology | Cat# 4249<br>RRID: AB_2165248    |
| PI3 Kinase p110 $\beta$ (C33D4)             | Cell Signaling Technology | Cat# 3011<br>RRID:AB_2165246     |
| PI3 Kinase p110 $\delta$                    | Abcam                     | Cat# ab1678<br>RRID: 302513      |
| Neurofibromin                               | Santa Cruz Biotechnology  | Cat# sc-67<br>RRID:AB_21496819   |
| Donkey anti-Mouse IgG (H+L) Alexa Fluor 488 | ThermoFisher Scientific   | Cat# A21202<br>RRID:AB_141607    |
| Rabbit IgG HRP Linked Whole Ab              | GE Healthcare             | NA934-1ML<br>RRID:AB_772206      |
| Goat Anti-Mouse IgG (H + L)-HRP Conjugate   | Biorad                    | Cat#:1706516<br>RRID:AB_11125547 |
|                                             |                           |                                  |
|                                             |                           |                                  |
|                                             |                           |                                  |

Supp Table 1: List of antibodies used in this study, their manufacturers, catalog numbers and Research Resource Identifier (RRID) numbers.

Related to Supplementary Figure S1 full blots (Biorad ChemiDoc)

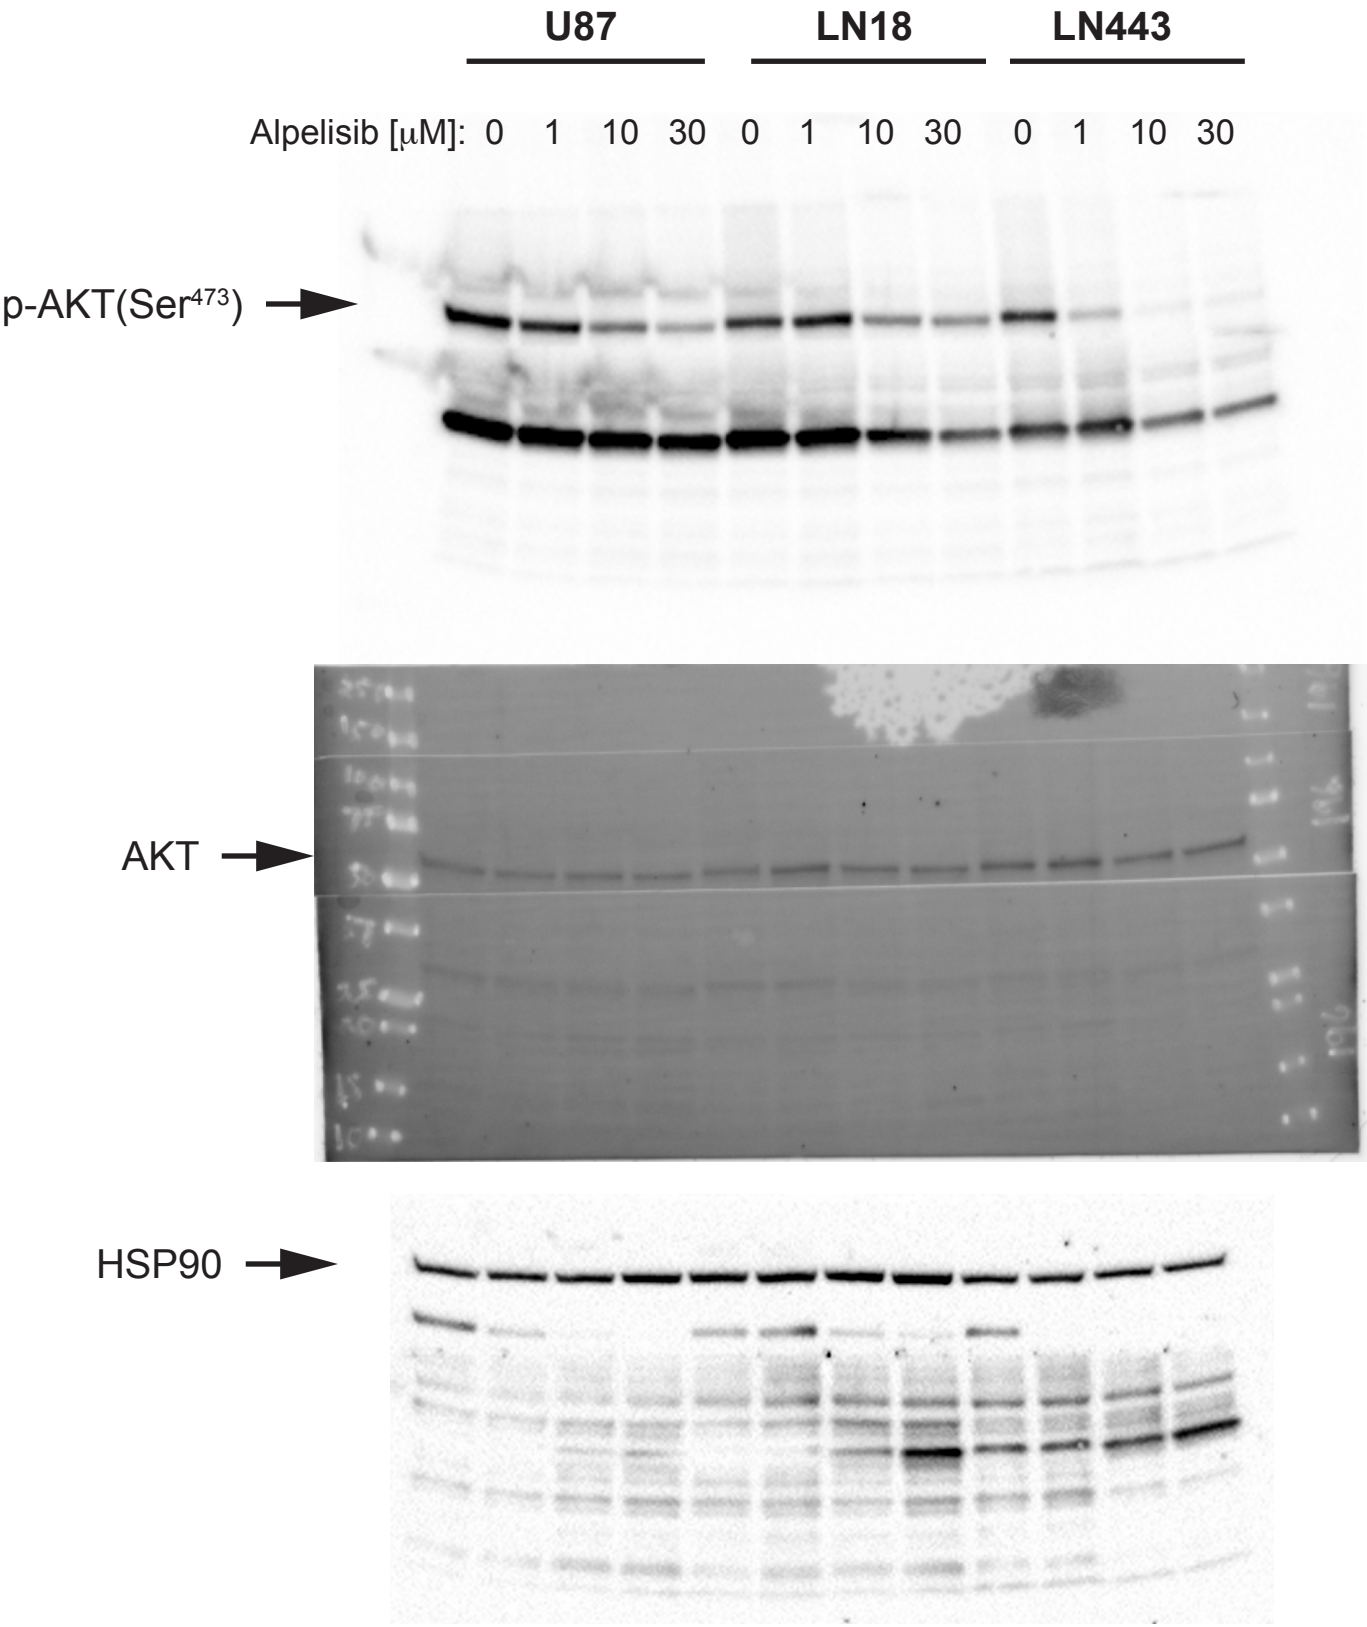

Related to Supplementary Figure S2 full blots (Biorad ChemiDoc)

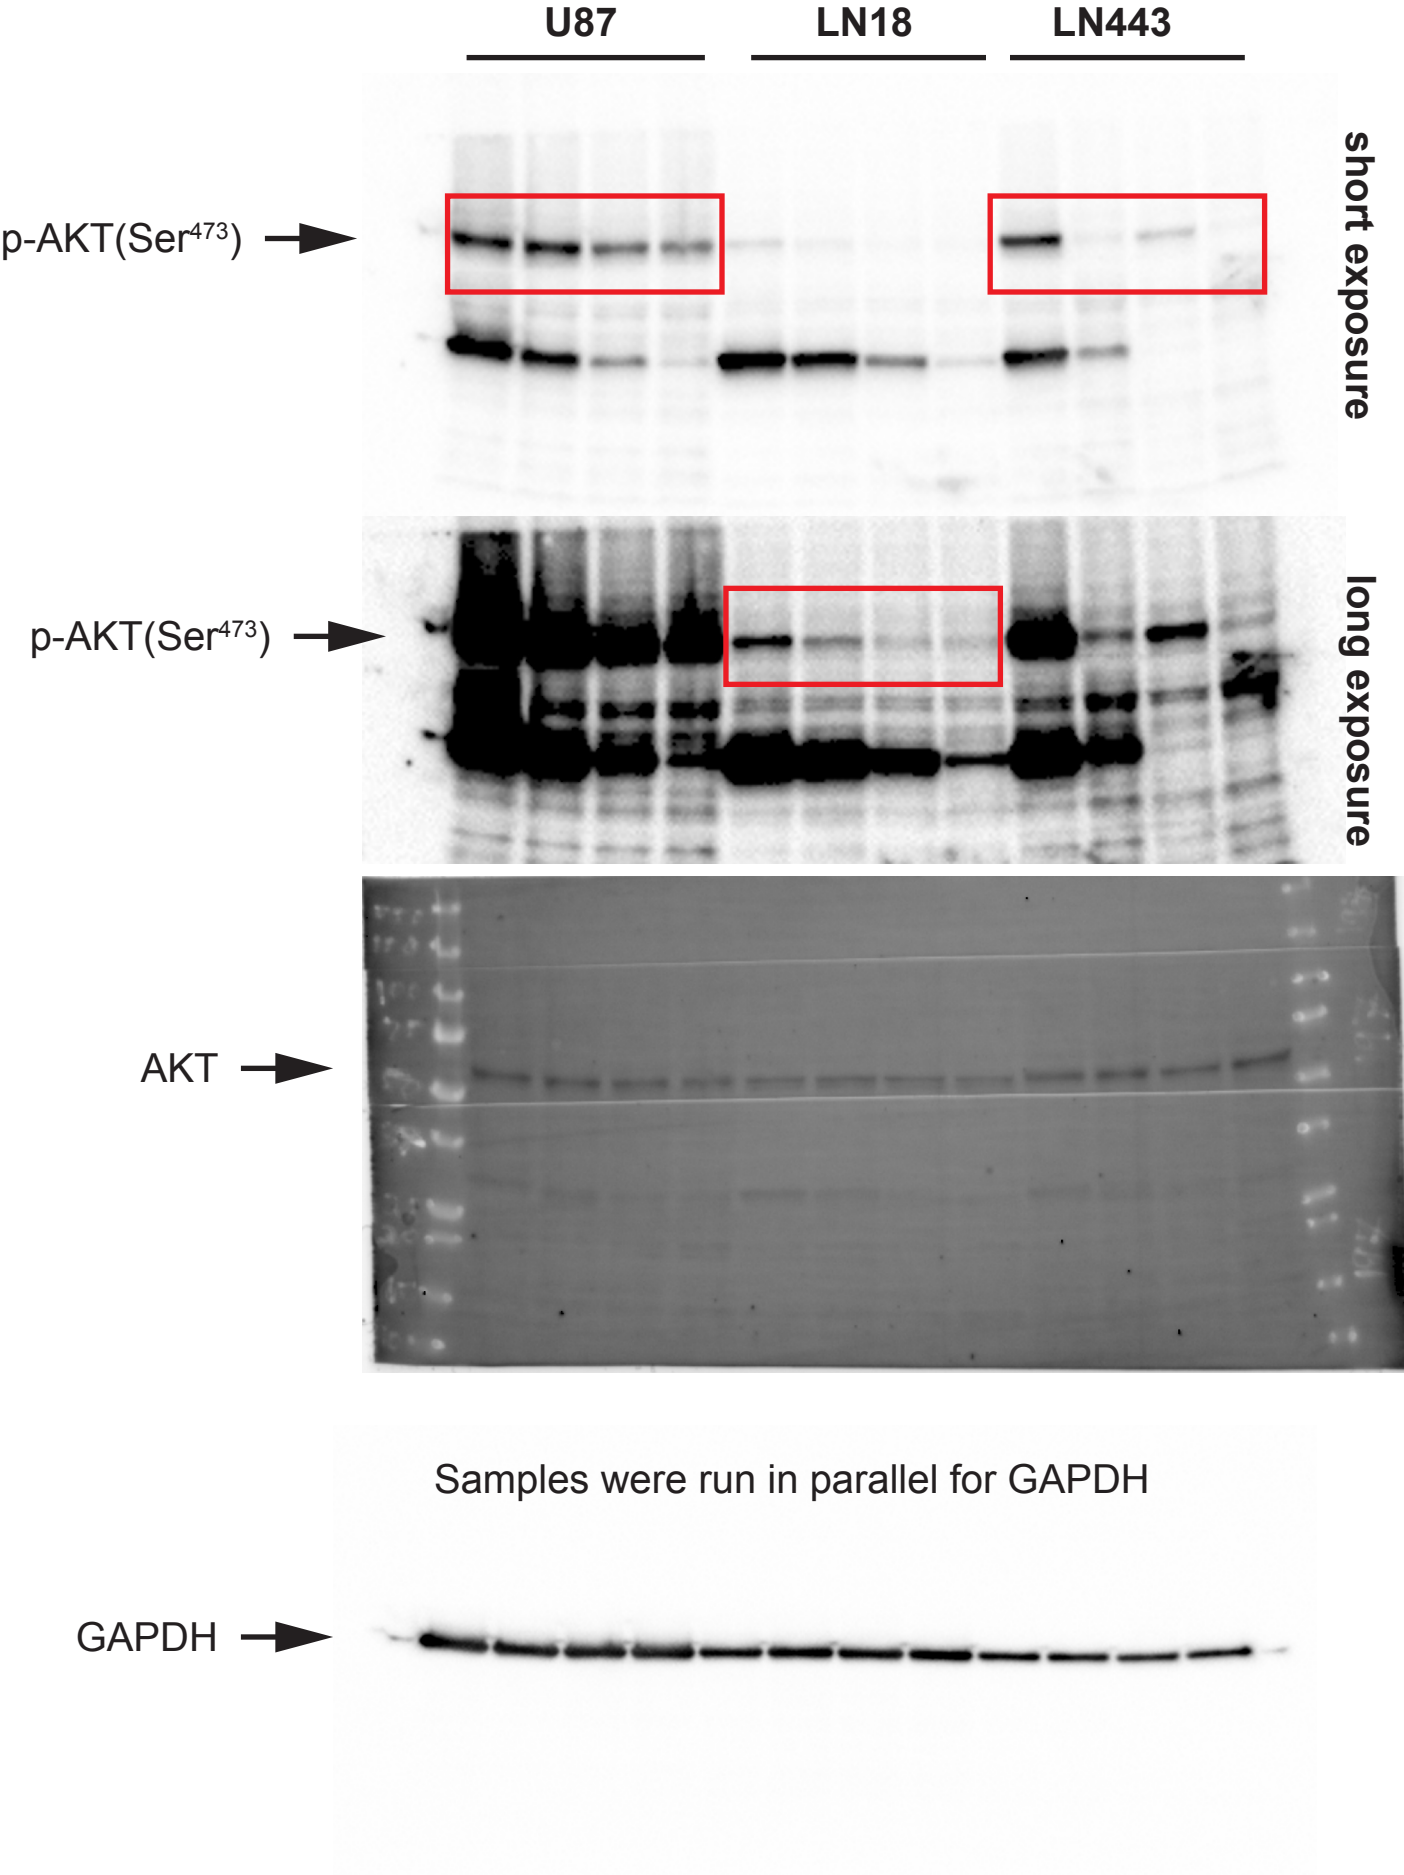

Related to Figure 1 full blots (Biorad ChemiDoc)

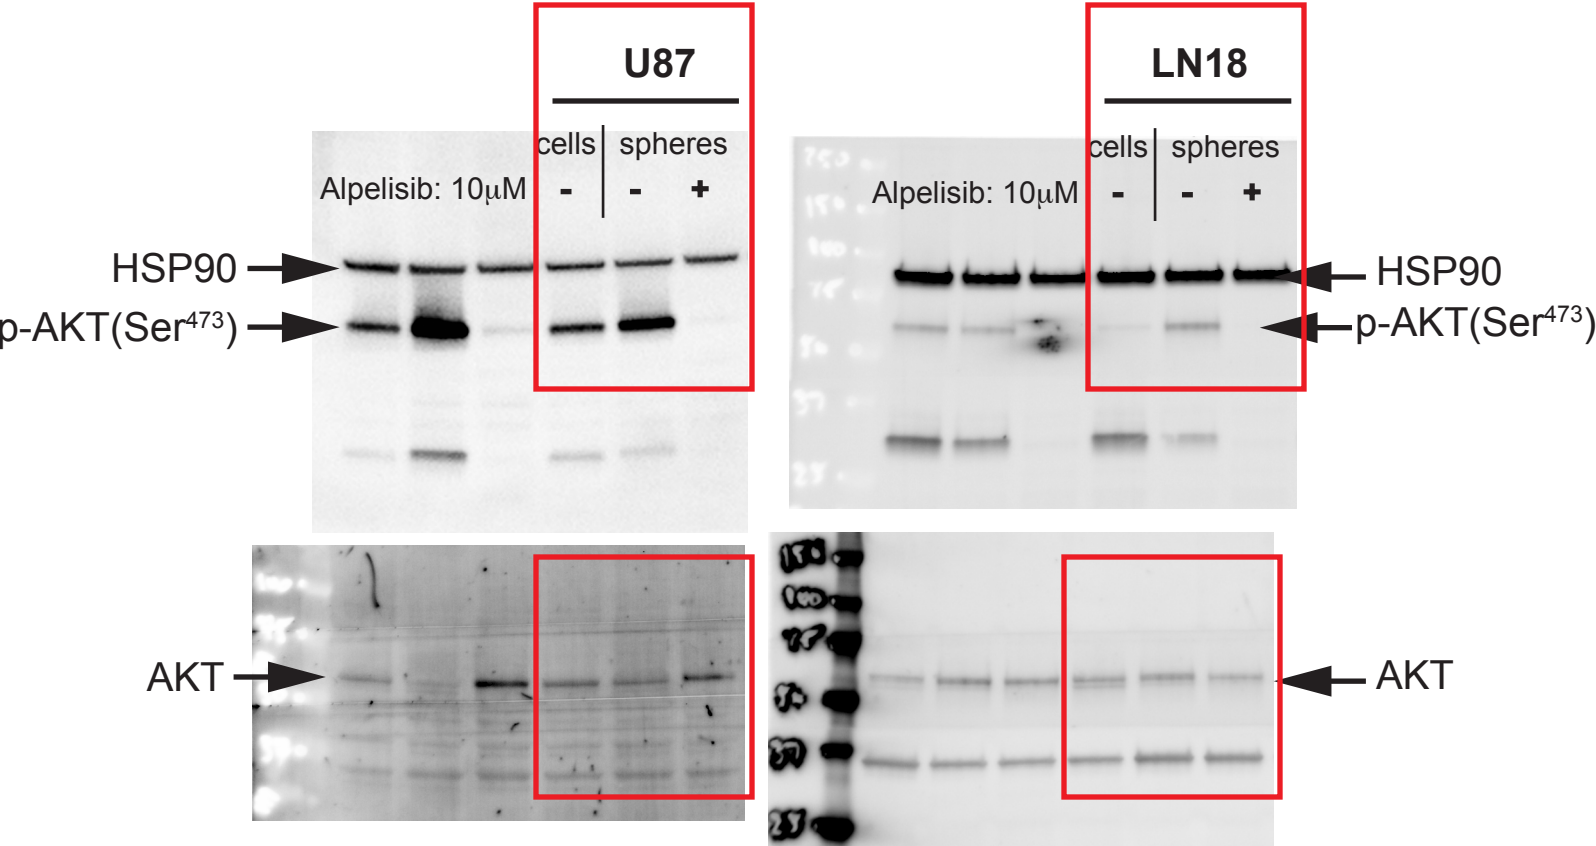

Related to Figure 4 full blots (Biorad ChemiDoc) (4C, red; 4F, green)

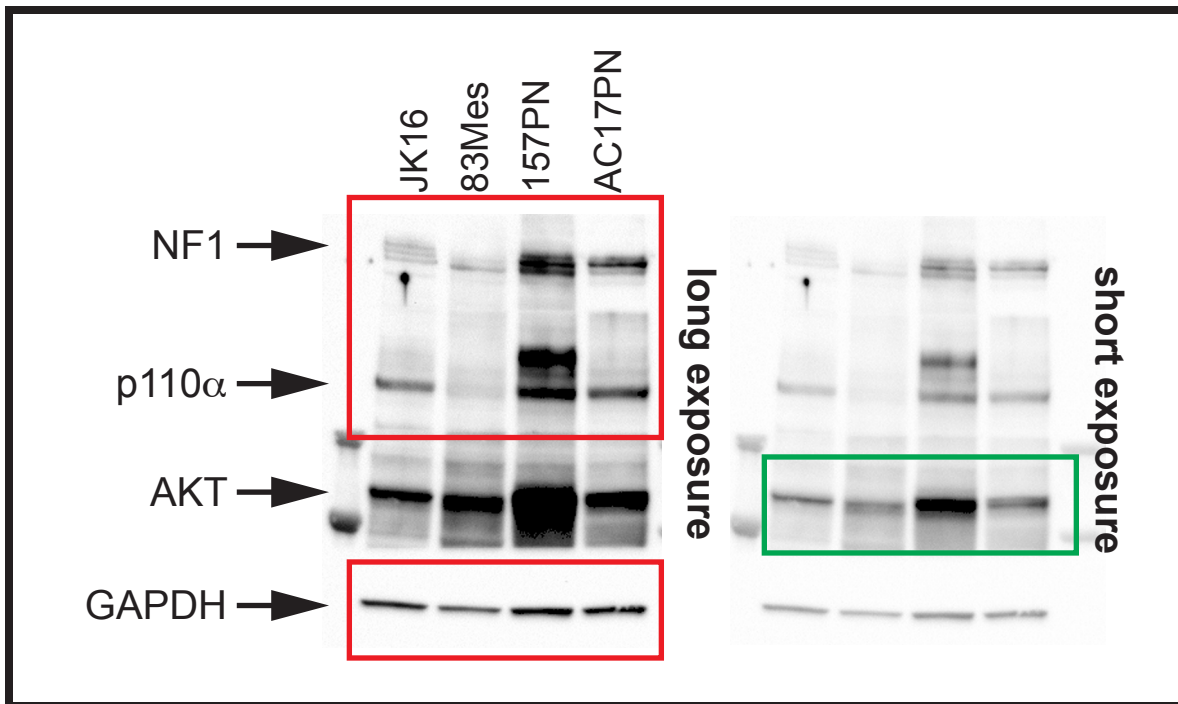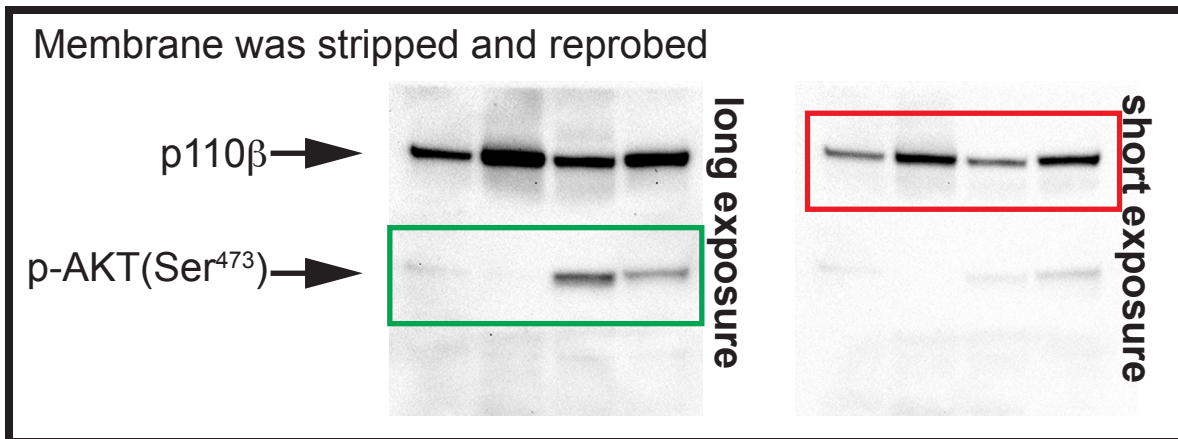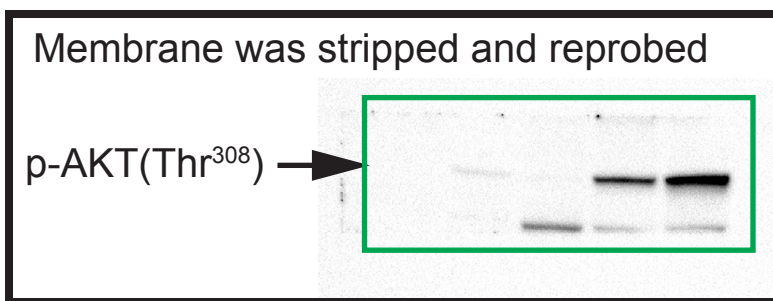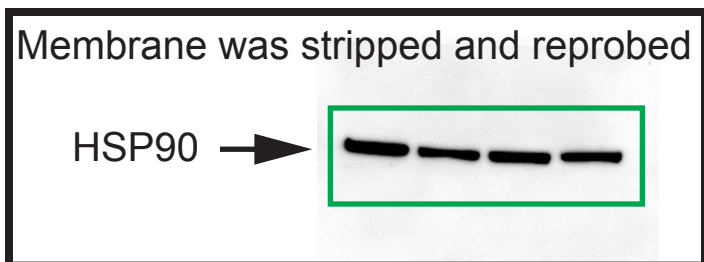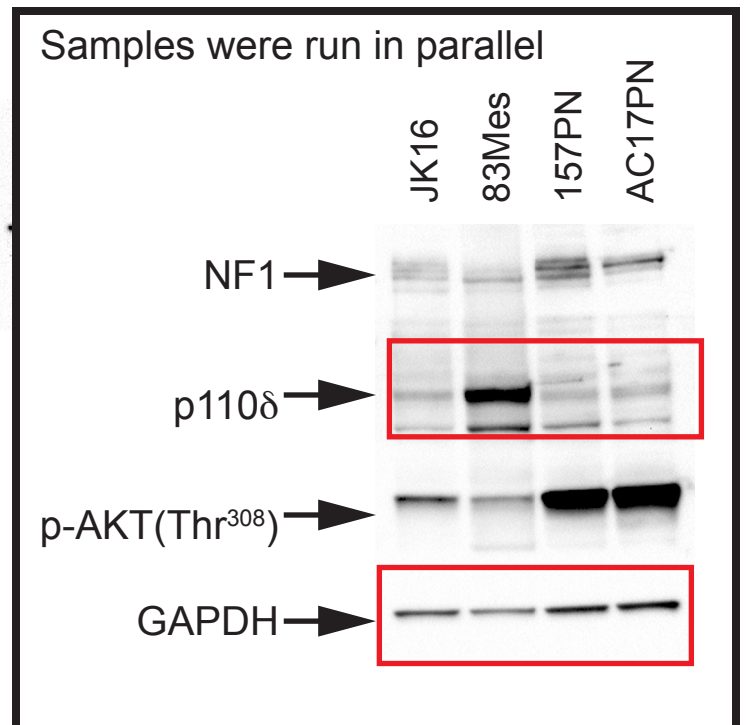

Supplement: 41598_2020_78788_MOESM2_ESM.pdf [file 41598_2020_78788_MOESM2_ESM.pdf]
